# Supplementary material for: Early response of methanogenic archaea to H2 as evaluated by metagenomics and metatranscriptomics
Source: Research Square preprint supplement (doi:10.21203/rs.3.rs-368581/v1), 2021-04-02
Supplement: Supplementary file 1 [file 8400e04ef62138b2fe4cf61d.xlsx]

## Sheet: DAS_v2.summary.v2
	Basic information				anvio single copy genes		Quality information								Merged-tax								Mash best hit genome		Mash							GTDB-tk																	relative abundance (percent of all reads)
bin_ID	num_contigs	N50	size	GC_content	total_scgs	supporting_scgs	anvio_completion	anvio_redundancy	anvio_quality	checkm_completion	checkm_redundancy	checkm_quality	checkm_lineage	Tax_consensus	t_domain	t_phylum	t_class	t_order	t_family	t_genus	t_species	distance	genome1	genome2	t_domain	t_phylum	t_class	t_order	t_family	t_genus	t_species	t_domain	t_phylum	t_class	t_order	t_family	t_genus	t_species		H2_DNA_P1	H2_DNA_P2	H2_MTR_P1	H2_MTR_P2	N2_DNA_P1	N2_DNA_P2	N2_MTR_P1	N2_MTR_P2		H2_DNA_P1
bin_1	163	41655	3163728	32.2185	11	10	97.1831	7.04225	M	99.32	14.51	L	Clostridiales	YES	Bacteria	Firmicutes	Clostridia	Acetivibrionales	Acetivibrionaceae	Herbivorax	Herbivorax saccincola	0.113595	GCA_002844395		k__Bacteria	p__Firmicutes	c__Clostridia	o__Clostridiales	f__Ruminococcaceae	g__Herbivorax	s__Herbivorax_saccincola	Bacteria	Firmicutes_A	Clostridia	Acetivibrionales	Acetivibrionaceae	Herbivorax		bin_1.Herbivorax saccincola	111750	32979	23329	8391	105072	40841	30865	17257		0.021364
bin_10	62	86589	2720423	35.4719	19	19	91.5493	0	H	97.76	1.006	H	Clostridiales	YES	Bacteria	Firmicutes	Clostridia	Lachnospirales	Lachnospiraceae	Herbinix	Herbinix luporum	0.00460913	GCA_900070325		k__Bacteria	p__Firmicutes	c__Clostridia	o__Clostridiales	f__Lachnospiraceae	g__Herbinix	s__Herbinix_luporum	Bacteria	Firmicutes_A	Clostridia	Lachnospirales	Lachnospiraceae	Herbinix	Herbinix luporum	bin_10.Herbinix luporum	90790	38882	653	335	84005	43134	746	561		0.0173569
bin_11	509	5997	2209485	43.4379	17	17	84.507	2.8169	M	87.54	8.333	M	Clostridia	YES	Bacteria	Firmicutes	Mahellia	Caldicoprobacterales	UBA3941	UBA3941	UBA3941 sp002385665	1										Bacteria	Firmicutes_A	Mahellia_A	Caldicoprobacterales	UBA3941	UBA3941	UBA3941 sp002385665	bin_11.UBA3941 sp002385665	22106	7119	3249	1029	17619	6941	1382	691		0.00422615
bin_12	189	8584	1091963	35.4923	18	18	80.2817	0	M	93.77	0.28	H	Bacteria	YES	Bacteria	Firmicutes	Bacilli	RFN20	CAG-826	UBA1361	UBA1361 sp002306335	0.178176										Bacteria	Firmicutes	Bacilli	RFN20	CAG-826	UBA1361	UBA1361 sp002306335	bin_12.UBA1361 sp002306335	12790	4180	1002	309	9946	4353	649	250		0.00244515
bin_13	20	137924	1743938	43.3666	20	20	98.5915	0	H	95.96	0	H	Clostridia	YES	Bacteria	Firmicutes	Clostridia	4C28d-15	DTU072	DTU072	DTU072 sp001512685	0.200503										Bacteria	Firmicutes_A	Clostridia_A	Christensenellales	DTU072	DTU072	DTU072 sp001512685	bin_13.DTU072 sp001512685	33900	9801	2633	280	31495	11145	4175	839		0.00648089
bin_14	434	2467	963227	34.5158	1	1	40.8451	2.8169	L	52.65	4.529	M	Bacteria	YES	Bacteria	Bacteroidota	Bacteroidia	Bacteroidales	WCHB1-69	UBA1205	UBA1205 sp002309615	0.200503										Bacteria	Bacteroidota	Bacteroidia	Bacteroidales	WCHB1-69	UBA5266		bin_14.UBA1205 sp002309615	6037	1923	49	10	6556	2644	251	118		0.00115413
bin_15	93	53590	2620529	47.4111	21	21	94.3662	0	H	97.9	1.748	H	Clostridiales	YES	Bacteria	Firmicutes	Clostridia	Acetivibrionales	Acetivibrionaceae	DTU013	DTU013 sp002385815	0.200503										Bacteria	Firmicutes_A	Clostridia	Acetivibrionales	Acetivibrionaceae	DTU013	DTU013 sp002385815	bin_15.DTU013 sp002385815	75361	14895	3774	572	60094	11489	4260	1437		0.0144073
bin_16	381	2991	1022012	47.1646	1	1	67.6056	1.40845	M	62.45	0.641	M	Clostridiales	YES	Bacteria	Firmicutes	Clostridia	Oscillospirales	Oscillospiraceae	UBA5446	UBA5446 sp002427465	1										Bacteria	Firmicutes_A	Clostridia	Oscillospirales	Oscillospiraceae			bin_16.UBA5446 sp002427465	8427	3320	3	0	6803	2968	3	2		0.00161105
bin_17	471	7097	2555673	36.6567	18	18	77.4648	0	M	84.95	3.122	M	Clostridiales	NO	Bacteria	Firmicutes	Clostridia	Clostridiales				0.148715	GCA_001262605		k__Bacteria	p__Firmicutes	c__Clostridia	o__Clostridiales	f__Ruminococcaceae	g__Pseudobacteroides	s__Pseudobacteroides_cellulosolvens	Bacteria	Firmicutes_A	Clostridia	Tissierellales	Sedimentibacteraceae	Sedimentibacter		bin_17.Unknown Domain	32111	11804	327	82	28534	12162	464	219		0.00613888
bin_18	158	6025	752436	30.6956	0	0	60.5263	0	M	73.44	1.869	M	Archaea	NO	Archaea	Iainarchaeota	Iainarchaeia	0-14-0-20-30-16	CSSED10-239			1										Archaea	Iainarchaeota	Iainarchaeia	0-14-0-20-30-16	CSSED10-239			bin_18.Unknown Domain	7520	1917	163	22	6711	2167	989	281		0.00143765
bin_19	53	113927	2350879	48.3985	17	17	88.7324	1.40845	M	92.72	3.818	H	Bacteria	YES	Bacteria	Chloroflexota	Anaerolineae	Anaerolineales	Anaerolineaceae	T78	T78 sp002305635	1										Bacteria	Chloroflexota	Anaerolineae	Anaerolineales	Anaerolineaceae	T78		bin_19.T78 sp002305635	103674	35157	5447	1072	83184	26988	4853	2281		0.0198201
bin_2	456	1953	855571	53.0185	13	12	43.662	1.40845	L	46.07	1.694	L	Bacteria	YES	Bacteria	Synergistota	Synergistia	Synergistales	Synergistaceae	Syner-03	Syner-03 sp002306075	0.178176										Bacteria	Synergistota	Synergistia	Synergistales	Synergistaceae	Syner-03	Syner-03 sp002306075	bin_2.Syner-03 sp002306075	5174	1552	334	19	4805	1293	756	159		0.000989149
bin_20	1427	3602	4605683	42.9866	14	9	69.0141	12.6761	M	84.77	29.99	L	Clostridia	NO	Bacteria	Firmicutes	Mahellia	Caldicoprobacterales	Caldicoprobacteraceae	DTU074	DTU074 sp002385885	0.137925	GCA_000953535		k__Bacteria	p__Bacteroidetes	c__Bacteroidia	o__Bacteroidales	f__Porphyromodaceae	g__Fermentimos	s__Fermentimos_caenicola	Bacteria	Firmicutes_A	Mahellia_A	Caldicoprobacterales	Caldicoprobacteraceae	DTU074		bin_20.DTU074 sp002385885	45732	13887	1300	280	38027	13169	2487	1145		0.0087429
bin_21	274	10556	2635629	43.0483	20	18	76.0563	16.9014	L	66.34	24.19	L	Firmicutes	Class	Bacteria	Firmicutes	Thermovenabulia	Thermovenabulales	Tepidanaerobacteraceae	DTU063	DTU063 sp001512695	0.178176										Bacteria	Firmicutes_A	Thermosediminibacteria	Thermosediminibacterales	Tepidanaerobacteraceae	DTU063		bin_21.DTU063 sp001512695	49170	14606	3298	497	40985	13929	5943	2168		0.00940016
bin_22	398	10860	2519952	38.6862	14	14	94.3662	0	H	94.91	0	H	Bacteria	NO	Bacteria	Caldatribacteriota	Caldatribacteriia	Caldatribacteriales	UBA8910	UBA8910		0.200503										Bacteria	Caldatribacteriota	Caldatribacteriia	Caldatribacteriales	UBA8910	UBA8910		bin_22.Unknown Domain	30461	11732	1502	267	27081	11957	3483	1958		0.00582344
bin_23	89	38613	1054652	33.1226	2	0	91.5493	7.04225	M	98.87	3.932	H	Bacteria	YES	Bacteria	Firmicutes	Bacilli	RFN20	CAG-826	UBA1361		0.200503										Bacteria	Firmicutes	Bacilli	RFN20	CAG-826	UBA1361		bin_23.Unknown Bacilli	21826	6321	2326	628	15314	5924	1419	445		0.00417262
bin_24	224	4155	855780	35.0381	15	11	57.7465	0	M	43.72	1.519	L	Bacilli	YES	Bacteria	Firmicutes	Bacilli	Haloplasmatales	Turicibacteraceae	Turicibacter	Turicibacter sp001543345	0.0297652	GCA_001543345		k__Bacteria	p__Firmicutes	c__Erysipelotrichia	o__Erysipelotrichales	f__Erysipelotrichaceae	g__Turicibacter	s__Turicibacter_sp_H121	Bacteria	Firmicutes	Bacilli	Haloplasmatales	Turicibacteraceae	Turicibacter	Turicibacter sp001543345	bin_24.Turicibacter sp001543345	6646	2848	2	0	6351	3173	1	0		0.00127056
bin_25	591	5357	2624627	50.2425	0	0	74.6479	2.8169	M	73.17	3.584	M	Deltaproteobacteria	NO	Bacteria	Myxococcota	UBA9042	UBA3505				1										Bacteria	Myxococcota	UBA9042	UBA3505				bin_25.Unknown Domain	25957	7236	1253	220	23573	6192	4570	1445		0.00496238
bin_26	230	17859	2367503	52.6228	19	19	87.3239	1.40845	M	94.5	4.395	H	Bacteria	YES	Bacteria	Cloacimonadota	Cloacimonadia	Cloacimonadales	Cloacimonadaceae	UBA4175	UBA4175 sp002379855	0.200503										Bacteria	Cloacimonadota	Cloacimonadia	Cloacimonadales	Cloacimonadaceae	UBA4175	UBA4175 sp002379855	bin_26.UBA4175 sp002379855	100473	32227	5470	1389	74281	21882	9551	3452		0.0192081
bin_27	160	31539	2928689	40.3385	8	3	92.1053	0	H	96.07	0	H	Euryarchaeota	YES	Archaea	Halobacterota	Methanosarcinia	Methanosarcinales	Methanosarcinaceae	Methanosarcina	Methanosarcina horonobensis	0.13365	GCA_000978965	GCA_000979035	k__Archaea	p__Euryarchaeota	c__Methanomicrobia	o__Methanosarciles	f__Methanosarciceae	g__Methanosarci	s__Methanosarci_mazei	Archaea	Halobacteriota	Methanosarcinia	Methanosarcinales	Methanosarcinaceae	Methanosarcina		bin_27.Methanosarcina horonobensis	324484	145247	3088	1087	293112	133867	11598	39505		0.0620338
bin_28	227	17198	2514963	52.9638	9	4	91.5493	2.8169	H	98.6	1.588	H	Spirochaetaceae	YES	Bacteria	Spirochaetota	Spirochaetia	Treponematales	Treponemataceae	Spiro-10	Spiro-10 sp001604405	1										Bacteria	Spirochaetota	Spirochaetia	Treponematales	Treponemataceae			bin_28.Spiro-10 sp001604405	15448	5198	154	102	62252	20030	8312	4076		0.0029533
bin_29	285	7385	1587899	41.0518	2	2	85.9155	0	M	87.09	1.612	M	Clostridia	YES	Bacteria	Firmicutes	Clostridia	4C28d-15	DTU072	DTU072	DTU072 sp001512685	1										Bacteria	Firmicutes_A	Clostridia_A	Christensenellales	DTU072	DTU072		bin_29.DTU072 sp001512685	14643	4476	251	30	14326	5764	1089	350		0.0027994
bin_3	281	9390	1998114	38.0877	17	17	77.4648	1.40845	M	92.29	1.612	H	Bacteria	YES	Bacteria	Bacteroidota	Bacteroidia	Bacteroidales	WCHB1-69	UBA5429	UBA5429 sp002427605	0.200503										Bacteria	Bacteroidota	Bacteroidia	Bacteroidales	WCHB1-69	UBA5429	UBA5429 sp002427605	bin_3.UBA5429 sp002427605	20131	7059	1577	268	20558	7585	1970	538		0.00384858
bin_30	223	7575	1229672	32.4583	13	13	64.7887	2.8169	M	47	2.07	L	Bacteria	NO	Bacteria	Patescibacteria	Paceibacteria	Paceibacterales	UBA5633	UBA2558	UBA2558 sp002340425	0.111545	GCA_001508635		k__Bacteria	p__Candidatus_Parcubacteria	c__Candidatus_Parcubacteria_unclassified	o__Candidatus_Parcubacteria_unclassified	f__Candidatus_Parcubacteria_unclassified	g__Candidatus_Parcubacteria_unclassified	s__Parcubacteria_bacterium_32_520	Bacteria	Patescibacteria	Paceibacteria	Paceibacterales	UBA5633	UBA2558		bin_30.UBA2558 sp002340425	21338	8219	242	156	18868	8640	137	109		0.00407933
bin_31	193	8320	1177927	28.5246	0	0	66.1972	2.8169	M	62.25	0	M	Bacteria	NO	Bacteria	Patescibacteria	Gracilibacteria	Absconditabacterales	X112			0.200503										Bacteria	Patescibacteria	Gracilibacteria	Absconditabacterales	X112			bin_31.Unknown Domain	14775	4279	37	24	13287	5028	182	98		0.00282464
bin_32	342	3273	1005421	37.6866	2	2	46.4789	0	L	46.05	0	L	Bacteria	YES	Bacteria	Bacteroidota	Bacteroidia	Bacteroidales	WCHB1-69	UBA5429	UBA5429 sp002427605	1										Bacteria	Bacteroidota	Bacteroidia	Bacteroidales	WCHB1-69			bin_32.UBA5429 sp002427605	7683	2378	168	36	7636	2773	370	145		0.00146881
bin_33	166	5273	754670	28.3483	2	2	57.7465	0	M	37.07	0	L	Bacteria	YES	Bacteria	Firmicutes	Bacilli	RF39	UBA5348	UBA5348	UBA5348 sp002411005	0.200503										Bacteria	Firmicutes	Bacilli	RF39	UBA5348	UBA5348		bin_33.UBA5348 sp002411005	15135	4542	250	44	13343	5664	417	141		0.00289346
bin_34	745	2119	1494683	64.4916	7	7	33.8028	2.8169	L	39	3.632	L	Bacteria	YES	Bacteria	Hydrogenedentota	Hydrogenedentia	Hydrogenedentiales	UBA2224	UBA2224	UBA2224 sp002348185	0.200503										Bacteria	Hydrogenedentota	Hydrogenedentia	Hydrogenedentiales	UBA2224	UBA2224		bin_34.UBA2224 sp002348185	9045	2784	240	16	8157	2013	648	150		0.00172919
bin_35	113	63721	2807470	36.439	8	5	97.3684	19.7368	L	98.4	20.53	L	Euryarchaeota	YES	Archaea	Euryarchaeota	Methanobacteria	Methanobacteriales	Methanobacteriaceae	Methanobacterium	Methanobacterium sp002496805	0.148715	GCA_000499765		k__Archaea	p__Euryarchaeota	c__Methanobacteria	o__Methanobacteriales	f__Methanobacteriaceae	g__Methanobacterium	s__Methanobacterium_sp_MB1	Archaea	Methanobacteriota	Methanobacteria	Methanobacteriales	Methanobacteriaceae	Methanobacterium		bin_35.Methanobacterium sp002496805	277927	101994	72845	34629	213864	93116	18063	11148		0.0531332
bin_36	696	3412	2095698	49.8595	8	5	49.2958	0	L	71.69	1.666	M	Bacteroidetes	YES	Bacteria	Bacteroidota	Bacteroidia	Bacteroidales	vadinHA17	SR-FBR-E99	SR-FBR-E99 sp002409145	1										Bacteria	Bacteroidota	Bacteroidia	Bacteroidales	VadinHA17	SR-FBR-E99		bin_36.SR-FBR-E99 sp002409145	16856	5272	458	108	13527	4031	647	255		0.00322248
bin_37	468	11632	4109977	59.5903	0	0	87.3239	0	M	88.06	1.136	M	Bacteria	NO	Bacteria	Planctomycetota	Phycisphaerae	Sedimentisphaerales	Anaerohalophaeraceae	B28-G16		0.200503										Bacteria	Planctomycetota	Phycisphaerae	Sedimentisphaerales	Anaerohalophaeraceae	B28-G16		bin_37.Unknown Domain	43352	15163	328	53	43811	13174	2789	987		0.0082879
bin_38	394	8779	2529448	45.693	21	19	92.9577	0	H	89.1	3.031	M	Clostridia	NO	Bacteria	Firmicutes_B	Syntrophomonadia	Syntrophomonadales	Syntrophomonadaceae	DTU018	DTU018 sp003444615	0.200503										Bacteria	Firmicutes_B	Syntrophomonadia	Syntrophomonadales	Syntrophomonadaceae	DTU018	DTU018 sp003444615	bin_38.Unknown Domain	29774	12247	504	78	25471	11734	2642	575		0.0056921
bin_39	888	2900	2208867	57.6113	2	2	46.4789	1.40845	L	67.37	1.225	M	Firmicutes	YES	Bacteria	Firmicutes	DTU014	DTU014	DTU014	DTU014	DTU014 sp900016865	0.200503										Bacteria	Firmicutes_G	DTU014	DTU014	DTU014			bin_39.DTU014 sp900016865	17523	3415	607	152	15545	3540	2294	511		0.00334999
bin_4	542	3117	1478137	58.9653	7	7	64.4737	0	M	88.21	2.553	M	Euryarchaeota	YES	Archaea	Thermoplasmatota	Thermoplasmata	Methanomassiliicoccales	Methanomassiliicoccaceae	DTU008	DTU008 sp001512965	0.126515	GCA_001421185		k__Archaea	p__Euryarchaeota	c__Thermoplasmata	o__Methanomassiliicoccales	f__Methanomassiliicoccales_unclassified	g__Methanomassiliicoccales_unclassified	s__Methanomassiliicoccales_archaeon_RumEn_M1	Archaea	Thermoplasmatota	Thermoplasmata	Methanomassiliicoccales	Methanomassiliicoccaceae	DTU008	DTU008 sp001512965	bin_4.DTU008 sp001512965	11112	2782	964	289	10111	2466	790	215		0.00212436
bin_40	383	6618	1787663	38.3356	3	2	81.6901	1.40845	M	94.79	2.719	H	Spirochaetaceae	YES	Bacteria	Spirochaetota	Spirochaetia	Treponematales	Treponemataceae	Treponema	Treponema brennaborense	0.200503										Bacteria	Spirochaetota	Spirochaetia	Treponematales	Treponemataceae			bin_40.Treponema brennaborense	20589	9092	4479	3674	16844	8191	2826	1535		0.00393614
bin_41	562	4347	2073561	36.0284	1	1	64.7887	0	M	78.1	1.661	M	Bacteria	Class	Bacteria	Bacteroidota	Bacteroidia	Bacteroidales	Muribaculaceae	CAG-1031	CAG-1031 sp000431215	0.178176										Bacteria	Bacteroidota	Bacteroidia	Bacteroidales	Salinivirgaceae			bin_41.CAG-1031 sp000431215	20318	3010	1221	183	18484	3001	1015	269		0.00388433
bin_42	199	25981	2199025	52.02	21	21	92.9577	0	H	98.3	0	H	Bacteria	YES	Bacteria	Synergistota	Synergistia	Synergistales	54-24	54-24	54-24 sp001508935	0.142866	GCA_000266925		k__Bacteria	p__Synergistetes	c__Synergistia	o__Synergistales	f__Synergistaceae	g__Acetomicrobium	s__Acetomicrobium_mobile	Bacteria	Synergistota	Synergistia	Synergistales	54-24	54-24	54-24 sp001508935	bin_42.54-24 sp001508935	36906	12587	266	145	32232	10171	6472	3531		0.00705557
bin_43	565	14340	5184448	59.4412	3	2	95.7746	1.40845	H	94.59	5.971	M	Bacteria	YES	Bacteria	Verrucomicrobiota	Kiritimatiellae	RFP12	UBA1067	UBA1211	UBA1211 sp002309585	0.165129										Bacteria	Verrucomicrobiota	Kiritimatiellae	RFP12	UBA1067			bin_43.UBA1211 sp002309585	98489	27056	1515	376	96565	23364	4455	1572		0.0188288
bin_44	90	54165	2355778	47.7819	1	1	90.1408	1.40845	H	86.52	2.482	M	Clostridiales	YES	Bacteria	Firmicutes	Clostridia	Saccharofermentanales	DTU023	UBA4923	UBA4923 sp002427535	0.200503										Bacteria	Firmicutes_A	Clostridia	Saccharofermentanales	DTU023			bin_44.UBA4923 sp002427535	41783	14852	301	82	34416	11988	544	237		0.00798794
bin_45	336	1970	629380	51.3026	0	0	32.3944	0	L	34.36	0.026	L	Clostridia	NO	Bacteria	Firmicutes_A	Clostridia					0.200503										Bacteria	Firmicutes_A	Clostridia					bin_45.Unknown Domain	4546	865	6	3	4068	1064	269	66		0.00086909
bin_46	993	2510	2212864	41.1174	6	5	50.7042	2.8169	M	70.14	7.364	M	Clostridiales	Order	Bacteria	Firmicutes	Clostridia	Acetivibrionales	Ruminiclostridiaceae	Ruminiclostridium	Ruminiclostridium sp001512485	0.178176										Bacteria	Firmicutes_A	Clostridia	Acetivibrionales	DSM-8532	Thermoclostridium		bin_46.Ruminiclostridium sp001512485	16547	4766	130	21	14589	6015	430	135		0.0031634
bin_47	227	1887	409654	33.6715	0	0	26.7606	0	L	42.45	0.313	L	Bacteria	NO	Bacteria	Patescibacteria	Dojkabacteria	SC72	SC72	UBA5232		1										Bacteria	Patescibacteria	Dojkabacteria	SC72	SC72	UBA5232		bin_47.Unknown Domain	2523	921	3	2	2056	807	10	3		0.000482339
bin_48	229	1727	391060	31.917	0	0	47.8873	0	L	60.67	2.309	M	Bacteria	NO	Bacteria	Patescibacteria	Paceibacteria	UBA6257	UBA6257			0.200503										Bacteria	Patescibacteria	Paceibacteria	UBA6257	UBA6257			bin_48.Unknown Domain	2200	1045	3	0	1975	1192	14	6		0.000420589
bin_49	55	4104	178144	33.5962	15	13	42.2535	0	L	1.612	0.023	L	Clostridiales	YES	Bacteria	Firmicutes	Clostridia	Clostridiales	Clostridiaceae	Clostridium	Clostridium sp001916075	0.123473	GCA_000436575		k__Bacteria	p__Firmicutes	c__Clostridia	o__Clostridiales	f__Clostridiaceae	g__Clostridium	s__Clostridium_sp_CAG_265	Bacteria	Firmicutes_A	Clostridia	Clostridiales	Clostridiaceae	Clostridium		bin_49.Clostridium sp001916075	9637	3206	111	46	9259	3889	167	123		0.00184237
bin_5	154	24579	2129025	45.7149	17	16	88.7324	2.8169	M	85.92	4.213	M	Bacteroidales	YES	Bacteria	Bacteroidota	Bacteroidia	Bacteroidales	Bacteroidaceae	UBA1179	UBA1179 sp002340405	0.178176										Bacteria	Bacteroidota	Bacteroidia	Bacteroidales	Bacteroidaceae	UBA1179	UBA1179 sp002340405	bin_5.UBA1179 sp002340405	51576	16413	100	27	44382	16854	96	27		0.00986013
bin_50	268	54850	2610403	39.6628	3	1	87.3239	0	M	79.48	2.447	M	Clostridiales	YES	Bacteria	Firmicutes	Clostridia	Clostridiales				0.148715	GCA_002844395		k__Bacteria	p__Firmicutes	c__Clostridia	o__Clostridiales	f__Ruminococcaceae	g__Herbivorax	s__Herbivorax_saccincola	Bacteria	Firmicutes_A	Clostridia	Acetivibrionales	DSM-8532	DTU059		bin_50.Unknown Domain	115192	30721	4714	1184	95534	30052	5107	2706		0.022022
bin_51	28	338913	1575812	43.5047	2	0	76.3158	0	M	79.2	0.246	M	Euryarchaeota	YES	Archaea	Euryarchaeota	Methanobacteria	Methanobacteriales	Methanobacteriaceae	Methanobacterium		1										Archaea	Methanobacteriota	Methanobacteria	Methanobacteriales	Methanobacteriaceae			bin_51.Unknown Methanobacterium	63999	21692	29950	13808	51492	19351	10892	7080		0.0122351
bin_52	9	11714	56385	51.8246	11	11	35.2113	0	L	2.699	0	L	Bacteria	YES	Bacteria	Bacteroidota	Bacteroidia	Bacteroidales	Marinilabiliaceae	UBA7646	UBA7646 sp002411385	0.200503										Bacteria	Bacteroidota	Bacteroidia	Bacteroidales	Marinilabiliaceae	UBA7646		bin_52.UBA7646 sp002411385	1202	300	1764	670	922	263	1195	535		0.000229794
bin_53	122	50941	2820965	50.2139	17	11	94.3662	7.04225	M	85.75	12.94	L	Firmicutes	YES	Bacteria	Firmicutes	Desulfotomaculia	Desulfotomaculales	Pelotomaculaceae	DTU098	DTU098 sp001512635	0.165129										Bacteria	Firmicutes_B	Desulfotomaculia	Desulfotomaculales	Pelotomaculaceae	DTU098	DTU098 sp002305915	bin_53.DTU098 sp001512635	90691	33551	343	217	78628	28956	566	1437		0.017338
bin_54	135	8122	566600	48.8734	1	1	42.2535	1.40845	L	16.41	6.227	L	Bacteria	YES	Bacteria	Fibrobacterota	Chitinivibrionia	Chitinivibrionales	Chitinispirillaceae	Chitinispirillum	Chitinispirillum alkaliphilum	0.165129										Bacteria	Fibrobacterota	Chitinivibrionia	Chitinivibrionales				bin_54.Chitinispirillum alkaliphilum	11164	3098	4506	1765	9913	2780	10368	4173		0.0021343
bin_55	36	91988	715784	33.9324	5	2	46.4789	0	L	18.79	0	L	Clostridiales	YES	Bacteria	Firmicutes	Clostridia	Lachnospirales	Cellulosilyticaceae	Cellulosilyticum		0.200503										Bacteria	Firmicutes_A	Clostridia	Lachnospirales	Cellulosilyticaceae			bin_55.Unknown Cellulosilyticum	13199	3224	483	257	14102	4054	1829	877		0.00252334
bin_56	67	15639	465841	32.7727	2	2	50.7042	1.40845	M	15.43	0.02	L	Clostridiales	YES	Bacteria	Firmicutes	Clostridia	Lachnospirales	Defluviitaleaceae	Defluviitalea	Defluviitalea phaphyphila	0.155881										Bacteria	Firmicutes_A	Clostridia	Lachnospirales	Defluviitaleaceae			bin_56.Defluviitalea phaphyphila	8348	2272	748	276	7764	2445	666	385		0.00159594
bin_57	317	11851	1796383	48.0893	16	16	77.4648	0	M	69.06	6.432	M	Firmicutes	NO	Bacteria	Firmicutes_D	Dethiobacteria	DTU022	UBA8154	UBA9862		0.200503										Bacteria	Firmicutes_D	Dethiobacteria	DTU022	UBA8154	UBA9862		bin_57.Unknown Domain	32982	12406	128	16	29496	11739	150	160		0.00630539
bin_58	704	13774	3640299	29.4342	2	0	91.5493	54.9296	L	96.06	99.25	L	Bacteria	YES	Bacteria	Firmicutes	Bacilli	RF39	CAG-822			0.165129										Bacteria	Firmicutes	Bacilli	RF39	CAG-822			bin_58.Unknown Firmicutes	60816	11022	1299	404	46495	12499	1339	505		0.0116266
bin_59	78	44289	2058114	57.1709	22	18	71.831	21.1268	L	63.23	44.11	L	Firmicutes	YES	Bacteria	Firmicutes	Limnochordia	DTU010	DTU010	DTU010	DTU010 sp900018335	0.200503										Bacteria	Firmicutes_G	Limnochordia	DTU010	DTU010	DTU010		bin_59.DTU010 sp900018335	265876	66008	55654	19295	239434	60651	78468	22807		0.0508293
bin_6	405	8181	2697618	59.6381	7	4	72.3684	11.8421	L	91.2	17.12	L	Euryarchaeota	YES	Archaea	Halobacterota	Methanomicrobia	Methanomicrobiales	Methanocullaceae	Methanoculleus	Methanoculleus bourgensis	0.0186376	GCA_900079125		k__Archaea	p__Euryarchaeota	c__Methanomicrobia	o__Methanomicrobiales	f__Methanomicrobiaceae	g__Methanoculleus	s__Methanoculleus_bourgensis	Archaea	Halobacteriota	Methanomicrobia	Methanomicrobiales	Methanoculleaceae	Methanoculleus	Methanoculleus bourgensis	bin_6.Methanoculleus bourgensis	100966	31283	54699	17613	95031	25102	7860	3808		0.0193024
bin_60	705	6485	2682896	60.3935	6	1	75	6.57895	M	84.78	10.78	L	Euryarchaeota	YES	Archaea	Halobacterota	Methanomicrobia	Methanomicrobiales	Methanocullaceae	Methanoculleus		0.0868923	GCA_900036045		k__Archaea	p__Euryarchaeota	c__Methanomicrobia	o__Methanomicrobiales	f__Methanomicrobiaceae	g__Methanoculleus	s__Methanoculleus_sp_MAB1	Archaea	Halobacteriota	Methanomicrobia	Methanomicrobiales	Methanoculleaceae	Methanoculleus		bin_60.Unknown Methanoculleus	35655	11405	1309	391	33952	9258	404	161		0.00681641
bin_61	116	26548	1935659	56.9248	16	15	56.338	4.22535	M	28.23	1.143	L	Firmicutes	YES	Bacteria	Firmicutes	Limnochordia	DTU010	DTU010	DTU010	DTU010 sp002391385	0.178176										Bacteria	Firmicutes_G	Limnochordia	DTU010	DTU010	DTU010		bin_61.DTU010 sp002391385	210825	49577	21134	6982	193428	47910	39901	10754		0.0403048
bin_62	1161	4522	4026646	57.8204	0	0	84.507	2.8169	M	85.33	10.34	L	Bacteria	NO	Bacteria	Verrucomicrobiota	Lentisphaeria	UBA1407	UBA1407			0.200503										Bacteria	Verrucomicrobiota	Lentisphaeria	UBA1407	UBA1407			bin_62.Unknown Domain	37025	8496	251	42	45971	11066	4129	1477		0.00707832
bin_63	73	53487	1945261	40.1191	17	17	84.507	0	M	83.46	0.806	M	Clostridia	YES	Bacteria	Firmicutes	Mahellia	Caldicoprobacterales	DTU083	UBA3906	UBA3906 sp002391555	1										Bacteria	Firmicutes_A	Mahellia_A	Caldicoprobacterales	DTU083	UBA3906	UBA3906 sp002391555	bin_63.UBA3906 sp002391555	121938	35795	14318	6195	96298	33451	5999	4578		0.0233117
bin_64	143	21367	2051687	59.8856	21	21	91.5493	0	H	86.65	1.38	M	Bacteria	YES	Bacteria	Verrucomicrobiota	Kiritimatiellae	LD1-PB3	Lenti-01	Lenti-01	Lenti-01 sp002304915	0.200503										Bacteria	Verrucomicrobiota	Kiritimatiellae	LD1-PB3	Lenti-01	Lenti-01	Lenti-01 sp002304915	bin_64.Lenti-01 sp002304915	202119	54674	5000	749	189247	45462	4914	1689		0.0386405
bin_65	629	3396	1969962	53.9128	0	0	57.7465	0	M	68.85	0.206	M	Bacteria	NO	Bacteria	Planctomycetota	Phycisphaerae	Sedimentisphaerales	Anaerohalophaeraceae	T3Sed10-213		1										Bacteria	Planctomycetota	Phycisphaerae	Sedimentisphaerales	Anaerohalophaeraceae	T3Sed10-213		bin_65.Unknown Domain	14621	5783	1	0	11954	4487	133	59		0.0027952
bin_66	241	14663	2107860	58.1101	5	3	82.8947	3.94737	M	80.34	3.267	M	Euryarchaeota	YES	Archaea	Halobacterota	Methanomicrobia	Methanomicrobiales	Methanocullaceae	Methanoculleus	Methanoculleus bourgensis	0.0752427	GCA_900036045		k__Archaea	p__Euryarchaeota	c__Methanomicrobia	o__Methanomicrobiales	f__Methanomicrobiaceae	g__Methanoculleus	s__Methanoculleus_sp_MAB1	Archaea	Halobacteriota	Methanomicrobia	Methanomicrobiales	Methanoculleaceae	Methanoculleus		bin_66.Methanoculleus bourgensis	69841	22311	1875	628	67851	18856	604	318		0.013352
bin_67	66	55371	1980418	39.4916	20	17	97.1831	0	H	92.77	1.118	H	Clostridiales	YES	Bacteria	Firmicutes	Clostridia	Tissierellales	Sedimentibacteraceae	Sedimentibacter	Sedimentibacter sp002316225	0.200503										Bacteria	Firmicutes_A	Clostridia	Tissierellales	Sedimentibacteraceae	Sedimentibacter		bin_67.Sedimentibacter sp002316225	80466	30953	3057	655	71399	32176	2394	1174		0.0153832
bin_68	357	16176	3548241	37.8926	16	14	91.5493	1.40845	M	91.94	6.263	M	Clostridiales	Family	Bacteria	Firmicutes	Clostridia	Acetivibrionales	Acetivibrionaceae	Ruminiclostridium	Ruminiclostridium sp001512505	0.126515	GCA_002844395		k__Bacteria	p__Firmicutes	c__Clostridia	o__Clostridiales	f__Ruminococcaceae	g__Herbivorax	s__Herbivorax_saccincola	Bacteria	Firmicutes_A	Clostridia	Acetivibrionales	Acetivibrionaceae	Hungateiclostridium		bin_68.Ruminiclostridium sp001512505	148386	39476	21894	6764	130682	43100	19550	11155		0.028368
bin_69	101	22098	1415874	45.5843	8	6	84.507	0	M	91.52	0.847	H	Bacteria	YES	Bacteria	Synergistota	Synergistia	Synergistales	Acetomicrobiaceae	Acetomicrobium	Acetomicrobium flavidum	0.178176										Bacteria	Synergistota	Synergistia	Synergistales	Acetomicrobiaceae	Acetomicrobium		bin_69.Acetomicrobium flavidum	35154	10949	1969	698	30942	10782	5663	2554		0.00672063
bin_7	97	71750	3233346	49.6291	9	4	90.1408	1.40845	H	98.36	2.459	H	Bacteria	YES	Bacteria	Bacteroidota	Bacteroidia	Bacteroidales	Dysgonomonadaceae	Fermentimonas		0.178176										Bacteria	Bacteroidota	Bacteroidia	Bacteroidales	Dysgonomonadaceae	Fermentimonas		bin_7.Unknown Dysgonomonadaceae	83320	28613	4768	1408	71960	23848	2907	1345		0.0159288
bin_70	419	8131	2474266	68.9699	15	14	73.2394	1.40845	M	94.56	3.399	H	Actinomycetales	YES	Bacteria	Actinobacteriota	Actinobacteria	Mycobacteriales	Mycobacteriaceae	Corynebacterium	Corynebacterium humireducens	0.0143307	GCA_000819445		k__Bacteria	p__Actinobacteria	c__Actinobacteria	o__Corynebacteriales	f__Corynebacteriaceae	g__Corynebacterium	s__Corynebacterium_humireducens	Bacteria	Actinobacteriota	Actinomycetia	Mycobacteriales	Mycobacteriaceae	Corynebacterium	Corynebacterium humireducens	bin_70.Corynebacterium humireducens	29390	8771	299	264	24086	5714	480	255		0.00561869
bin_71	291	3041	842319	46.0042	11	0	46.4789	0	L	44.78	1.587	L	Bacteroidetes	YES	Bacteria	Bacteroidota	Bacteroidia	Bacteroidales	UBA932	Bact-11		1										Bacteria	Bacteroidota	Bacteroidia	Bacteroidales	UBA932	Bact-11	Bact-11 sp002376715	bin_71.Unknown Bact-11	7007	2077	226	44	5761	1824	202	59		0.00133958
bin_72	508	2762	1387774	49.0836	13	13	52.1127	1.40845	M	55.32	4.608	M	Firmicutes	YES	Bacteria	Firmicutes	DTU065	DTU065	DTU065	DTU065	DTU065 sp001512545	0.178176										Bacteria	Firmicutes_G	DTU065	DTU065	DTU065	DTU065	DTU065 sp001512545	bin_72.DTU065 sp001512545	11381	2230	677	170	9871	2891	1270	578		0.00217578
bin_73	651	3858	2256461	57.2689	0	0	71.831	0	M	73.25	2.967	M	Bacteria	NO	Bacteria	Verrucomicrobiota	Kiritimatiellae	RFP12	UBA3636			1										Bacteria	Verrucomicrobiota	Kiritimatiellae	RFP12	UBA3636			bin_73.Unknown Domain	19494	6373	18	4	17718	5369	62	29		0.0037268
bin_74	164	21689	1981201	49.6228	20	20	83.0986	0	M	88.13	0	M	Firmicutes	YES	Bacteria	Firmicutes	Dethiobacteria	Dethiobacterales	Dethiobacteraceae	DTU027	DTU027 sp002385745	0.200503										Bacteria	Firmicutes_D	Dethiobacteria	Dethiobacterales	Dethiobacteraceae	DTU027	DTU027 sp002385745	bin_74.DTU027 sp002385745	24376	9132	116	57	21041	8100	220	128		0.00466012
bin_75	280	7137	1365240	47.7045	15	13	78.8732	5.6338	M	68.9	0.509	M	Clostridiales	YES	Bacteria	Firmicutes	Clostridia	Peptostreptococcales	Anaerovoracaceae	UBA1426	UBA1426 sp002385825	0.200503										Bacteria	Firmicutes_A	Clostridia	Peptostreptococcales	Anaerovoracaceae	UBA1426	UBA1426 sp002385825	bin_75.UBA1426 sp002385825	14163	3778	338	65	12107	3937	1231	479		0.00270764
bin_76	133	23735	1825703	42.1337	22	22	94.3662	1.40845	H	96.61	0	H	Bacteria	YES	Bacteria	Caldatribacteriota	Caldatribacteriia	Caldatribacteriales	Caldatribacteriaceae	UBA3950	UBA3950 sp002385475	1										Bacteria	Caldatribacteriota	Caldatribacteriia	Caldatribacteriales	Caldatribacteriaceae	UBA3950	UBA3950 sp002385475	bin_76.UBA3950 sp002385475	39000	13250	930	378	32572	14242	3282	1762		0.00745589
bin_77	150	19775	1877187	28.808	22	22	94.3662	0	H	87.38	0.714	M	Bacteroidetes	YES	Bacteria	Bacteroidota	Bacteroidia	Bacteroidales	DTU049	DTU049	DTU049 sp001512885	0.200503										Bacteria	Bacteroidota	Bacteroidia	Bacteroidales	DTU049	DTU049	DTU049 sp001512885	bin_77.DTU049 sp001512885	37248	10267	242	73	35071	13685	2813	905		0.00712095
bin_78	57	43570	1496756	53.1453	0	0	78.8732	0	M	67.34	0	M	Firmicutes	NO	Bacteria	Firmicutes_D	Dethiobacteria	DTU022	DTU022			0.200503										Bacteria	Firmicutes_D	Dethiobacteria	DTU022	DTU022			bin_78.Unknown Domain	42577	15598	588	393	34116	11903	954	1151		0.00813973
bin_79	188	19271	2020518	51.4381	22	22	87.3239	0	M	95.6	1.098	H	Bacteria	YES	Bacteria	Cloacimonadota	Cloacimonadia	Cloacimonadales	Cloacimonadaceae	UBA3900	UBA3900 sp002391675	0.200503										Bacteria	Cloacimonadota	Cloacimonadia	Cloacimonadales	Cloacimonadaceae	UBA3900	UBA3900 sp002391675	bin_79.UBA3900 sp002391675	31971	8886	2062	431	27653	7900	3236	1354		0.00611211
bin_8	441	5391	1950796	37.391	19	19	77.4648	0	M	88.67	2.659	M	Bacteria	YES	Bacteria	Bacteroidota	Bacteroidia	Bacteroidales	Dysgonomonadaceae	Fermentimonas	Fermentimonas massiliensis	0.0115627	GCA_000953535		k__Bacteria	p__Bacteroidetes	c__Bacteroidia	o__Bacteroidales	f__Porphyromodaceae	g__Fermentimos	s__Fermentimos_caenicola	Bacteria	Bacteroidota	Bacteroidia	Bacteroidales	Dysgonomonadaceae	Fermentimonas	Fermentimonas massiliensis	bin_8.Fermentimonas massiliensis	21996	6327	2582	954	11928	4710	972	246		0.00420512
bin_80	329	6290	1613311	36.5343	10	8	59.1549	1.40845	M	69.21	3.789	M	Clostridiales	YES	Bacteria	Firmicutes	Clostridia	Lachnospirales	Lachnospiraceae	Herbinix	Herbinix luporum	0.200503										Bacteria	Firmicutes_A	Clostridia	Lachnospirales	Lachnospiraceae	Herbinix		bin_80.Herbinix luporum	17226	5095	872	539	14445	4831	465	323		0.00329321
bin_81	189	16642	1947115	39.2935	15	13	85.9155	0	M	84.61	1.006	M	Clostridiales	YES	Bacteria	Firmicutes	Clostridia	Lachnospirales	Lachnospiraceae	Herbinix	Herbinix luporum	0.200503										Bacteria	Firmicutes_A	Clostridia	Lachnospirales	Lachnospiraceae	Herbinix		bin_81.Herbinix luporum	26910	5996	1215	410	22121	5915	1051	364		0.00514457
bin_82	350	13918	2558825	48.4258	22	22	85.9155	1.40845	M	89.21	2.228	M	Firmicutes	NO	Bacteria	Firmicutes	SHA-98	UBA4971	UBA4971	UBA2557	UBA2557 sp900019985	0.142866	GCA_001028815		k__Bacteria	p__Firmicutes	c__Clostridia	o__Clostridiales	f__Peptococcaceae	g__Peptococcaceae_unclassified	s__Peptococcaceae_bacterium_1109	Bacteria	Firmicutes_G	SHA-98	UBA4971	UBA4971	UBA2557	UBA2557 sp900019985	bin_82.UBA2557 sp900019985	37658	8601	1077	248	32020	9689	3024	1324		0.00719933
bin_83	112	28672	1752903	37.402	21	15	100	0	H	96.61	2.067	H	Lactobacillales	YES	Bacteria	Firmicutes	Bacilli	Lactobacillales	Streptococcaceae	Streptococcus	Streptococcus_equinus	0.0224566	GCA_900102715		k__Bacteria	p__Firmicutes	c__Bacilli	o__Lactobacillales	f__Streptococcaceae	g__Streptococcus	s__Streptococcus_equinus	Bacteria	Firmicutes	Bacilli	Lactobacillales	Streptococcaceae	Streptococcus	Streptococcus equinus	bin_83.Unknown Streptococcus	26892	12326	14	2	25716	13089	16	2		0.00514113
bin_84	88	48147	2136519	46.6348	21	21	87.3239	0	M	95.57	0.349	H	Clostridiales	NO	Bacteria	Firmicutes	Clostridia	Acetivibrionales	Ruminiclostridiaceae	DTU059	DTU059 sp001512555	0.148715	GCA_000185445	GCA_000225705	k__Bacteria	p__Actinobacteria	c__Actinobacteria	o__Actinomycetales	f__Actinomycetaceae	g__Mobiluncus	s__Mobiluncus_curtisii	Bacteria	Firmicutes_A	Clostridia	Acetivibrionales	DSM-8532	DTU059	DTU059 sp001512555	bin_84.DTU059 sp001512555	126897	24280	4816	948	103948	20098	5708	1818		0.0242598
bin_9	601	4324	2188577	31.6452	15	15	77.4648	2.8169	M	77.58	0.555	M	Bacteria	YES	Bacteria	Bacteroidota	Bacteroidia	Bacteroidales	ML635J-15	Bact-19	Bact-19 sp002412425	0.200503										Bacteria	Bacteroidota	Bacteroidia	Bacteroidales	ML635J-15	Bact-19	Bact-19 sp002412425	bin_9.Bact-19 sp002412425	18090	7886	457	154	16731	9543	878	632		0.00345839
																																							sum.binned	4270306	1335736	392355	142184	3778574	1270040	375995	192161		0.816383
															ANVIO	CheckM																							Unbinned	960455	285975	94179	32594	887394	292451	99789	37521		0.183617
														H	16	21																							sum.counts	5230761	1621711	486534	174778	4665968	1562491	475784	229682
														M	49	38
														L	19	25
[truncated: 8 more columns]
